# Supplementary material for: Conformational Changes in a Hyperthermostable Glycoside Hydrolase: Enzymatic Activity Is a Consequence of the Loop Dynamics and Protonation Balance
Source: PubMed Central journal article supplement (PMC4344334; doi:10.1371/journal.pone.0118225), 2015-02-27
Supplement: pone.0118225.s011.pdf [file pone.0118225.s011.pdf]

**Table S1: Conformational searching through flexible models.** The table presents the lower  $\chi^2$  found for each one of the 14 model constructions.

| Loop interactions removed       | Agreement between curves          |      |      |
|---------------------------------|-----------------------------------|------|------|
|                                 | pH 4                              | pH 6 | pH 8 |
|                                 | <i>lowest <math>\chi^2</math></i> |      |      |
| <b>Shadow</b>                   | 6.1                               | 11.9 | 3.2  |
| <b>1</b>                        | 2.5                               | 2.9  | 3.2  |
| <b>2</b>                        | 8.3                               | 10.4 | 3.2  |
| <b>3</b>                        | 8.1                               | 10.5 | 3.2  |
| <b>4</b>                        | 7.3                               | 9.4  | 3.2  |
| <b>1 and 2</b>                  | 6.8                               | 9.2  | 3.2  |
| <b>1 and 3</b>                  | 5.4                               | 7.3  | 3.2  |
| <b>1 and 4</b>                  | 5.5                               | 8.5  | 3.2  |
| <b>2 and 3</b>                  | 8.4                               | 9.3  | 3.2  |
| <b>2 and 4</b>                  | 8.1                               | 10   | 3.2  |
| <b>3 and 4</b>                  | 7.8                               | 10.3 | 3.2  |
| <b>1, 2 and 3</b>               | 5.7                               | 7.7  | 3.2  |
| <b>1, 2 and 4</b>               | 5.7                               | 7.3  | 3.2  |
| <b>1, 3 and 4</b>               | 5.3                               | 7    | 3.2  |
| <b>2, 3 and 4</b>               | 7.2                               | 9.1  | 3.2  |
| <b>1, 2, 3 and 4</b>            | 5.5                               | 6.4  | 3.2  |
| <b>Reference (PDB id: 3PZ9)</b> | 11.9                              | 18.9 | 3.2  |
