# Supplementary material for: Conformational Changes in a Hyperthermostable Glycoside Hydrolase: Enzymatic Activity Is a Consequence of the Loop Dynamics and Protonation Balance
Source: PubMed Central journal article supplement (PMC4344334; doi:10.1371/journal.pone.0118225), 2015-02-27
Supplement: pone.0118225.s012.pdf [file pone.0118225.s012.pdf]

**Table S2: Distance between active site CA atoms.** The residues were identified using a structure of TpMan in complex with  $\beta$ -D-glucose (PDB id: 3PZI), where the distances between ligand and residue are lower than 5 Å.

| Pairs                     | Distances between CA atoms<br>(Å) |              |              | Distance between CB atoms<br>(Å) |              |              |
|---------------------------|-----------------------------------|--------------|--------------|----------------------------------|--------------|--------------|
|                           | pH 8                              | pH 6         | pH 4         | pH 8                             | pH 6         | pH 4         |
| TRP:134-GLU:198           | 7.8                               | 7.3          | 8.4          | 6.6                              | 6.3          | 7.5          |
| TRP:134-ARG:200           | 9.3                               | 9.9          | 9.8          | 9.3                              | 9.6          | 9.8          |
| TRP:134-GLU:235           | 12.6                              | 13           | 13.7         | 11.4                             | 12           | 12.5         |
| TRP:134-TRP:253           | 18.3                              | 19           | 18.9         | 17.1                             | 18           | 18.1         |
| TRP:134-TYR:280           | 15.7                              | 16.3         | 16.3         | 13                               | 13.8         | 13.7         |
| TRP:134-HIS:283           | 14.8                              | 14.4         | 15.4         | 12.2                             | 11.9         | 12.8         |
| TRP:134-TRP:284           | 15.7                              | 15.5         | 17           | 14.9                             | 14.8         | 16.2         |
| GLU:198-ARG:200           | 6.4                               | 6.4          | 6.1          | 6.8                              | 6.8          | 6.4          |
| GLU:198-GLU:235           | 5.3                               | 6            | 5.7          | 5.2                              | 6            | 5.4          |
| GLU:198-TRP:253           | 14.8                              | 15.4         | 15.3         | 14.2                             | 15           | 15.1         |
| GLU:198-TYR:280           | 12                                | 12.6         | 12.5         | 9.9                              | 10.7         | 10.3         |
| GLU:198-HIS:283           | 13.5                              | 13.1         | 14           | 11.1                             | 10.8         | 11.4         |
| GLU:198-TRP:284           | 13.3                              | 13.1         | 14.3         | 11.8                             | 11.8         | 12.7         |
| ARG:200-GLU:235           | 8.7                               | 8.6          | 9            | 7.8                              | 7.5          | 7.6          |
| ARG:200-TRP:253           | 12.3                              | 12.8         | 13.1         | 10.8                             | 11.8         | 11.9         |
| ARG:200-TYR:280           | 15.5                              | 16           | 16           | 13.7                             | 14.3         | 13.9         |
| ARG:200-HIS:283           | 15.6                              | 15.4         | 15.9         | 13.6                             | 13.5         | 13.3         |
| ARG:200-TRP:284           | 14.3                              | 14.2         | 15.4         | 12.7                             | 12.7         | 13.3         |
| GLU:235-TRP:253           | 12.3                              | 12.8         | 13.2         | 11.2                             | 11.7         | 12.6         |
| GLU:235-TYR:280           | 9.3                               | 10           | 10.1         | 8.2                              | 9.3          | 9.1          |
| GLU:235-HIS:283           | 12.4                              | 12.7         | 13.1         | 10.5                             | 11.1         | 11           |
| GLU:235-TRP:284           | 11.3                              | 11.5         | 12.4         | 8.9                              | 9.3          | 10.1         |
| TRP:253-TYR:280           | 13.2                              | 13.3         | 13.6         | 12.9                             | 13           | 13.7         |
| TRP:253-HIS:283           | 12.2                              | 12.2         | 11.6         | 12.2                             | 12.2         | 11.5         |
| TRP:253-TRP:284           | 8.7                               | 8.8          | 8.6          | 7.9                              | 7.9          | 8.2          |
| TYR:280-HIS:283           | 5.6                               | 6            | 5.7          | 4.4                              | 4.7          | 4.6          |
| TYR:280-TRP:284           | 6.2                               | 6.3          | 6.5          | 5.5                              | 5.4          | 6.3          |
| HIS:283-TRP:284           | 3.7                               | 3.5          | 3.6          | 5.5                              | 5.3          | 5.2          |
| <b>Sum of distances</b>   | <b>320.8</b>                      | <b>326.1</b> | <b>335.2</b> | <b>289.3</b>                     | <b>297.2</b> | <b>304.2</b> |
| <b>Average</b>            | <b>11.5</b>                       | <b>11.6</b>  | <b>12</b>    | <b>10.3</b>                      | <b>10.6</b>  | <b>10.9</b>  |
| <b>Standard deviation</b> | <b>3.7</b>                        | <b>3.8</b>   | <b>3.9</b>   | <b>3.2</b>                       | <b>3.3</b>   | <b>3.4</b>   |
