# Supplementary material for: Conformational Changes in a Hyperthermostable Glycoside Hydrolase: Enzymatic Activity Is a Consequence of the Loop Dynamics and Protonation Balance
Source: PubMed Central journal article supplement (PMC4344334; doi:10.1371/journal.pone.0118225), 2015-02-27
Supplement: pone.0118225.s013.pdf [file pone.0118225.s013.pdf]

**Table S3: Estimative of the pKa obtained from PROPKA 3.0.** The evaluation was performed using the representative conformations for each scenario on its pH. The protonation of the residue is obtained using the pKa values and the Henderson-Hasselbalch equation.

| Residue | pKa-pKmodel |       |       | pKa   |       |       | pKmodel | [A <sup>-</sup> ]/[HA] |          |          |
|---------|-------------|-------|-------|-------|-------|-------|---------|------------------------|----------|----------|
|         | pH 4        | pH 6  | pH 8  | pH 4  | pH 6  | pH 8  |         | pH 4                   | pH 6     | pH 8     |
| 37      | -0.12       | -0.06 | -0.14 | 7.88  | 7.94  | 7.86  | 8       | 0.0001                 | 0.0115   | 1.3804   |
| 38      | -0.17       | -0.61 | -0.3  | 12.33 | 11.89 | 12.2  | 12.5    | 0                      | 0        | 0.0001   |
| 45      | -0.14       | 5.83  | 2.12  | 9.86  | 15.83 | 12.12 | 10      | 0                      | 0        | 0.0001   |
| 46      | 1.41        | 3.16  | 2.71  | 11.41 | 13.16 | 12.71 | 10      | 0                      | 0        | 0        |
| 48      | -2.35       | -3.69 | -3.15 | 4.15  | 2.81  | 3.35  | 6.5     | 0.7079                 | 1548.817 | 44668.37 |
| 49      | 5.65        | 2.07  | 4.56  | 15.65 | 12.07 | 14.56 | 10      | 0                      | 0        | 0        |
| 50      | 0.01        | -2.01 | -0.08 | 10.51 | 8.49  | 10.42 | 10.5    | 0                      | 0.0032   | 0.0038   |
| 53      | 0.21        | 0.15  | 0.62  | 12.71 | 12.65 | 13.12 | 12.5    | 0                      | 0        | 0        |
| 56      | -1.13       | 0.09  | 0.12  | 2.67  | 3.89  | 3.92  | 3.8     | 21.3796                | 128.8249 | 12022.64 |
| 60      | 0.17        | 1.16  | 0.71  | 4.67  | 5.66  | 5.21  | 4.5     | 0.2138                 | 2.1878   | 616.595  |
| 63      | 0.23        | 0.25  | -0.08 | 12.73 | 12.75 | 12.42 | 12.5    | 0                      | 0        | 0        |
| 64      | 0.16        | -0.14 | 0.39  | 3.96  | 3.66  | 4.19  | 3.8     | 1.0965                 | 218.7761 | 6456.542 |
| 68      | -0.09       | -0.34 | -0.05 | 10.41 | 10.16 | 10.45 | 10.5    | 0                      | 0.0001   | 0.0035   |
| 71      | 1.4         | 1.09  | 3.73  | 13.9  | 13.59 | 16.23 | 12.5    | 0                      | 0        | 0        |
| 77      | 1.61        | 2.67  | 4.96  | 5.41  | 6.47  | 8.76  | 3.8     | 0.0389                 | 0.3388   | 0.1738   |
| 79      | 0.22        | 0.1   | -0.75 | 4.72  | 4.6   | 3.75  | 4.5     | 0.1905                 | 25.1189  | 17782.79 |
| 81      | 0.39        | 0.84  | 0.56  | 10.39 | 10.84 | 10.56 | 10      | 0                      | 0        | 0.0028   |
| 82      | -0.05       | 0.49  | 2.9   | 8.95  | 9.49  | 11.9  | 9       | 0                      | 0.0003   | 0.0001   |
| 83      | -0.03       | -0.37 | 1.28  | 12.47 | 12.13 | 13.78 | 12.5    | 0                      | 0        | 0        |
| 84      | 0.17        | 0.18  | -0.78 | 3.97  | 3.98  | 3.02  | 3.8     | 1.0715                 | 104.7129 | 95499.27 |
| 85      | -0.06       | -0.81 | 0.37  | 10.44 | 9.69  | 10.87 | 10.5    | 0                      | 0.0002   | 0.0013   |
| 88      | 0.13        | 0.08  | 0.83  | 10.13 | 10.08 | 10.83 | 10      | 0                      | 0.0001   | 0.0015   |
| 90      | -0.07       | -0.61 | -4.02 | 6.43  | 5.89  | 2.48  | 6.5     | 0.0037                 | 1.2882   | 331131.1 |
| 92      | 0.13        | 0.43  | 0.76  | 4.63  | 4.93  | 5.26  | 4.5     | 0.2344                 | 11.749   | 549.5406 |
| 100     | 0.04        | 0.14  | 0.05  | 4.54  | 4.64  | 4.55  | 4.5     | 0.2884                 | 22.9087  | 2818.382 |
| 110     | -0.14       | 0.08  | -1.68 | 4.36  | 4.58  | 2.82  | 4.5     | 0.4365                 | 26.3027  | 151356.2 |
| 111     | -0.38       | -1.12 | 1.43  | 12.12 | 11.38 | 13.93 | 12.5    | 0                      | 0        | 0        |
| 113     | 1.6         | 1.87  | 1.07  | 5.4   | 5.67  | 4.87  | 3.8     | 0.0398                 | 2.138    | 1348.963 |
| 114     | 2.02        | 3.31  | 2.68  | 12.02 | 13.31 | 12.68 | 10      | 0                      | 0        | 0        |
| 118     | 0.37        | 1.21  | 1.25  | 10.87 | 11.71 | 11.75 | 10.5    | 0                      | 0        | 0.0002   |
| 120     | 0           | -0.09 | 0.66  | 10.5  | 10.41 | 11.16 | 10.5    | 0                      | 0        | 0.0007   |
| 121     | 0.07        | -0.73 | -0.94 | 4.57  | 3.77  | 3.56  | 4.5     | 0.2692                 | 169.8244 | 27542.29 |
| 125     | -0.46       | -0.8  | -0.44 | 10.04 | 9.7   | 10.06 | 10.5    | 0                      | 0.0002   | 0.0087   |
| 135     | -0.13       | 0.23  | -0.37 | 3.67  | 4.03  | 3.43  | 3.8     | 2.138                  | 93.3254  | 37153.5  |

|     |       |       |       |       |       |       |      |         |          |          |
|-----|-------|-------|-------|-------|-------|-------|------|---------|----------|----------|
| 136 | 0.45  | 0.87  | 0.84  | 4.25  | 4.67  | 4.64  | 3.8  | 0.5623  | 21.3796  | 2290.868 |
| 143 | 2.94  | 5.03  | 7.71  | 12.94 | 15.03 | 17.71 | 10   | 0       | 0        | 0        |
| 145 | 0     | -0.29 | -0.02 | 12.5  | 12.21 | 12.48 | 12.5 | 0       | 0        | 0        |
| 151 | 0.04  | 0.23  | -0.17 | 6.54  | 6.73  | 6.33  | 6.5  | 0.0029  | 0.1862   | 46.7735  |
| 152 | -1.33 | -0.98 | 0.21  | 5.17  | 5.52  | 6.71  | 6.5  | 0.0676  | 3.02     | 19.4984  |
| 153 | -0.43 | -0.53 | -1.63 | 3.37  | 3.27  | 2.17  | 3.8  | 4.2658  | 537.0318 | 676082.9 |
| 154 | 0.07  | -0.26 | -0.52 | 3.87  | 3.54  | 3.28  | 3.8  | 1.349   | 288.4032 | 52480.78 |
| 156 | 3.8   | 5.16  | 5.58  | 13.8  | 15.16 | 15.58 | 10   | 0       | 0        | 0        |
| 157 | 0.06  | 0.18  | 0.46  | 12.56 | 12.68 | 12.96 | 12.5 | 0       | 0        | 0        |
| 158 | 0.5   | -0.19 | -1.06 | 4.3   | 3.61  | 2.74  | 3.8  | 0.5012  | 245.4709 | 181970.2 |
| 159 | 0.25  | 0.15  | -0.71 | 4.75  | 4.65  | 3.79  | 4.5  | 0.1778  | 22.3872  | 16218.1  |
| 160 | -0.09 | 0.03  | 0.7   | 12.41 | 12.53 | 13.2  | 12.5 | 0       | 0        | 0        |
| 162 | -0.39 | 1.11  | 1.74  | 10.11 | 11.61 | 12.24 | 10.5 | 0       | 0        | 0.0001   |
| 163 | -1.02 | -0.34 | 0.13  | 3.48  | 4.16  | 4.63  | 4.5  | 3.3113  | 69.1831  | 2344.228 |
| 164 | 0.24  | 0.29  | 1.44  | 4.74  | 4.79  | 5.94  | 4.5  | 0.182   | 16.2181  | 114.8153 |
| 165 | 3.34  | 3.48  | 4.19  | 13.34 | 13.48 | 14.19 | 10   | 0       | 0        | 0        |
| 166 | 0.04  | -0.53 | 0.63  | 10.54 | 9.97  | 11.13 | 10.5 | 0       | 0.0001   | 0.0007   |
| 167 | -0.05 | 0.66  | 0.03  | 10.45 | 11.16 | 10.53 | 10.5 | 0       | 0        | 0.003    |
| 168 | 5.03  | 4.1   | 5.22  | 15.03 | 14.1  | 15.22 | 10   | 0       | 0        | 0        |
| 175 | -0.22 | -0.61 | -0.29 | 6.28  | 5.89  | 6.21  | 6.5  | 0.0052  | 1.2882   | 61.6595  |
| 179 | 0.6   | 0.24  | 1.49  | 10.6  | 10.24 | 11.49 | 10   | 0       | 0.0001   | 0.0003   |
| 184 | 4.4   | 3.91  | 6.93  | 14.4  | 13.91 | 16.93 | 10   | 0       | 0        | 0        |
| 185 | 0.02  | -0.18 | -0.06 | 12.52 | 12.32 | 12.44 | 12.5 | 0       | 0        | 0        |
| 186 | 0.05  | 0.18  | 0.05  | 4.55  | 4.68  | 4.55  | 4.5  | 0.2818  | 20.893   | 2818.382 |
| 187 | 1.83  | 0.01  | -1.19 | 6.33  | 4.51  | 3.31  | 4.5  | 0.0047  | 30.9029  | 48977.89 |
| 194 | 5.15  | 2.09  | -0.13 | 9.65  | 6.59  | 4.37  | 4.5  | 0       | 0.257    | 4265.796 |
| 198 | -2.15 | -0.59 | 3.32  | 2.35  | 3.91  | 7.82  | 4.5  | 44.6684 | 123.0269 | 1.5136   |
| 200 | 0.29  | -0.17 | 2.13  | 12.79 | 12.33 | 14.63 | 12.5 | 0       | 0        | 0        |
| 201 | 2.29  | 2.58  | 3.14  | 11.29 | 11.58 | 12.14 | 9    | 0       | 0        | 0.0001   |
| 202 | 0.06  | -0.14 | 0.09  | 4.56  | 4.36  | 4.59  | 4.5  | 0.2754  | 43.6516  | 2570.395 |
| 204 | -0.13 | -0.78 | -2.43 | 3.67  | 3.02  | 1.37  | 3.8  | 2.138   | 954.9926 | 4265797  |
| 205 | 0     | -0.57 | -0.42 | 10.5  | 9.93  | 10.08 | 10.5 | 0       | 0.0001   | 0.0083   |
| 212 | 0.11  | 0.25  | 0.18  | 4.61  | 4.75  | 4.68  | 4.5  | 0.2455  | 17.7828  | 2089.297 |
| 215 | -0.54 | -0.37 | -0.21 | 9.96  | 10.13 | 10.29 | 10.5 | 0       | 0.0001   | 0.0051   |
| 216 | 0.47  | -0.84 | -1.64 | 4.97  | 3.66  | 2.86  | 4.5  | 0.1072  | 218.7761 | 138038.5 |
| 220 | 0.25  | -0.39 | 0.51  | 10.25 | 9.61  | 10.51 | 10   | 0       | 0.0002   | 0.0031   |
| 222 | -0.29 | 0.01  | 0.25  | 10.21 | 10.51 | 10.75 | 10.5 | 0       | 0        | 0.0018   |
| 225 | 2.06  | 0.01  | -1.27 | 5.86  | 3.81  | 2.53  | 3.8  | 0.0138  | 154.8817 | 295121.1 |
| 228 | -1.84 | 0.52  | 0.23  | 4.66  | 7.02  | 6.73  | 6.5  | 0.2188  | 0.0955   | 18.6209  |
| 234 | 2.65  | 2.08  | 3.08  | 6.45  | 5.88  | 6.88  | 3.8  | 0.0035  | 1.3183   | 13.1826  |
| 235 | 4.51  | 6.19  | 3.02  | 9.01  | 10.69 | 7.52  | 4.5  | 0       | 0        | 3.02     |

|     |       |       |       |       |       |       |      |         |          |          |
|-----|-------|-------|-------|-------|-------|-------|------|---------|----------|----------|
| 241 | 2.53  | 0.64  | 4.74  | 12.53 | 10.64 | 14.74 | 10   | 0       | 0        | 0        |
| 242 | -0.09 | 0.08  | 0.04  | 4.41  | 4.58  | 4.54  | 4.5  | 0.389   | 26.3027  | 2884.032 |
| 245 | -0.54 | -0.08 | -0.02 | 9.96  | 10.42 | 10.48 | 10.5 | 0       | 0        | 0.0033   |
| 247 | 0.14  | 0.5   | 0.35  | 10.14 | 10.5  | 10.35 | 10   | 0       | 0        | 0.0045   |
| 250 | -0.6  | 1.18  | -1.92 | 3.9   | 5.68  | 2.58  | 4.5  | 1.2589  | 2.0893   | 263026.8 |
| 252 | 0.27  | 0.38  | 0.08  | 4.77  | 4.88  | 4.58  | 4.5  | 0.1698  | 13.1826  | 2630.269 |
| 255 | 4.26  | 3.01  | 5.29  | 14.26 | 13.01 | 15.29 | 10   | 0       | 0        | 0        |
| 262 | -0.42 | 0.87  | 0.04  | 3.38  | 4.67  | 3.84  | 3.8  | 4.1687  | 21.3796  | 14454.39 |
| 264 | -0.4  | -0.93 | -0.21 | 10.1  | 9.57  | 10.29 | 10.5 | 0       | 0.0003   | 0.0051   |
| 265 | 0.41  | -0.79 | 0.12  | 10.91 | 9.71  | 10.62 | 10.5 | 0       | 0.0002   | 0.0024   |
| 270 | 0.05  | 0.19  | 0.02  | 4.55  | 4.69  | 4.52  | 4.5  | 0.2818  | 20.4174  | 3019.952 |
| 273 | -0.15 | 0.62  | -0.54 | 3.65  | 4.42  | 3.26  | 3.8  | 2.2387  | 38.0189  | 54954.06 |
| 278 | 0.14  | 1.78  | -5.63 | 6.64  | 8.28  | 0.87  | 6.5  | 0.0023  | 0.0052   | 13489632 |
| 280 | 8.05  | 7.48  | 9.03  | 18.05 | 17.48 | 19.03 | 10   | 0       | 0        | 0        |
| 283 | -0.42 | -0.25 | -0.71 | 6.08  | 6.25  | 5.79  | 6.5  | 0.0083  | 0.5623   | 162.181  |
| 289 | 0.11  | -0.81 | -0.34 | 4.61  | 3.69  | 4.16  | 4.5  | 0.2455  | 204.1738 | 6918.312 |
| 291 | 0.7   | 1     | 1.04  | 10.7  | 11    | 11.04 | 10   | 0       | 0        | 0.0009   |
| 297 | -0.13 | -0.59 | 0.07  | 10.37 | 9.91  | 10.57 | 10.5 | 0       | 0.0001   | 0.0027   |
| 300 | 0.23  | 0.88  | 0.79  | 4.73  | 5.38  | 5.29  | 4.5  | 0.1862  | 4.1687   | 512.8615 |
| 301 | 2.01  | 1.92  | 1.04  | 5.81  | 5.72  | 4.84  | 3.8  | 0.0155  | 1.9055   | 1445.439 |
| 302 | -4.09 | -5.82 | -3.17 | 2.41  | 0.68  | 3.33  | 6.5  | 38.9045 | 208929.7 | 46773.52 |
| 304 | 0.08  | -0.02 | -0.03 | 10.58 | 10.48 | 10.47 | 10.5 | 0       | 0        | 0.0034   |
| 307 | -0.13 | -0.19 | -0.23 | 10.37 | 10.31 | 10.27 | 10.5 | 0       | 0        | 0.0054   |
| 308 | 0.06  | 0.13  | -0.02 | 4.56  | 4.63  | 4.48  | 4.5  | 0.2754  | 23.4423  | 3311.311 |
| 311 | -0.71 | -0.07 | -1.21 | 9.79  | 10.43 | 9.29  | 10.5 | 0       | 0        | 0.0513   |
| 316 | 1.02  | 4.35  | 8.09  | 5.52  | 8.85  | 12.59 | 4.5  | 0.0302  | 0.0014   | 0        |
| 317 | 5.91  | 1.26  | 1.68  | 10.41 | 5.76  | 6.18  | 4.5  | 0       | 1.7378   | 66.0694  |
| 318 | 5.15  | 4     | 3.48  | 15.15 | 14    | 13.48 | 10   | 0       | 0        | 0        |
| 322 | -0.11 | -0.28 | -0.18 | 10.39 | 10.22 | 10.32 | 10.5 | 0       | 0.0001   | 0.0048   |
| 328 | -0.29 | 0.48  | 0.97  | 12.21 | 12.98 | 13.47 | 12.5 | 0       | 0        | 0        |
| 332 | 2.46  | 1.42  | 2.28  | 12.46 | 11.42 | 12.28 | 10   | 0       | 0        | 0.0001   |
| 333 | 0.16  | 0.08  | 2.28  | 12.66 | 12.58 | 14.78 | 12.5 | 0       | 0        | 0        |
| 337 | 0.56  | 0.96  | 0.15  | 4.36  | 4.76  | 3.95  | 3.8  | 0.4365  | 17.378   | 11220.19 |
| 340 | 0.15  | 0.18  | 0.26  | 10.15 | 10.18 | 10.26 | 10   | 0       | 0.0001   | 0.0055   |
| 341 | -0.09 | 0.53  | 0.54  | 3.71  | 4.33  | 4.34  | 3.8  | 1.9498  | 46.7735  | 4570.88  |
| 345 | 0.55  | 0.38  | 0.35  | 4.35  | 4.18  | 4.15  | 3.8  | 0.4467  | 66.0694  | 7079.456 |
| 357 | 0.2   | 0.73  | -1.21 | 4.7   | 5.23  | 3.29  | 4.5  | 0.1995  | 5.8884   | 51286.14 |
| 360 | -0.5  | 0.43  | -1.35 | 3.3   | 4.23  | 2.45  | 3.8  | 5.0119  | 58.8844  | 354813.6 |
| 361 | -0.12 | -0.07 | -0.18 | 12.38 | 12.43 | 12.32 | 12.5 | 0       | 0        | 0        |
| 362 | -0.9  | -1.48 | -1.92 | 2.9   | 2.32  | 1.88  | 3.8  | 12.5893 | 4786.302 | 1318256  |
| 363 | 0.17  | 1.12  | -0.46 | 4.67  | 5.62  | 4.04  | 4.5  | 0.2138  | 2.3988   | 9120.109 |

|     |       |       |       |       |       |       |      |        |          |          |
|-----|-------|-------|-------|-------|-------|-------|------|--------|----------|----------|
| 364 | 0.36  | 0.17  | 1.28  | 12.86 | 12.67 | 13.78 | 12.5 | 0      | 0        | 0        |
| 366 | 2.97  | 0.34  | 0.55  | 12.97 | 10.34 | 10.55 | 10   | 0      | 0        | 0.0028   |
| 367 | 2.16  | 9.04  | 6.38  | 12.16 | 19.04 | 16.38 | 10   | 0      | 0        | 0        |
| 369 | 0.57  | -0.68 | -0.19 | 4.37  | 3.12  | 3.61  | 3.8  | 0.4266 | 758.5778 | 24547.11 |
| 370 | 0.44  | 1.62  | 1.97  | 10.44 | 11.62 | 11.97 | 10   | 0      | 0        | 0.0001   |
| 371 | 1.86  | 2.57  | 0.72  | 5.66  | 6.37  | 4.52  | 3.8  | 0.0219 | 0.4266   | 3019.952 |
| 374 | -0.38 | -0.42 | 0.25  | 12.12 | 12.08 | 12.75 | 12.5 | 0      | 0        | 0        |
| 378 | -0.47 | -0.82 | -1.84 | 3.33  | 2.98  | 1.96  | 3.8  | 4.6774 | 1047.129 | 1096478  |
| 379 | 0.25  | 0.01  | 0.12  | 4.05  | 3.81  | 3.92  | 3.8  | 0.8913 | 154.8817 | 12022.64 |
| 382 | 4.12  | 1.41  | -0.86 | 8.62  | 5.91  | 3.64  | 4.5  | 0      | 1.2303   | 22908.66 |
| 384 | 0.22  | -0.04 | -0.24 | 4.72  | 4.46  | 4.26  | 4.5  | 0.1905 | 34.6737  | 5495.406 |
| 387 | 0.14  | -0.12 | 0.15  | 12.64 | 12.38 | 12.65 | 12.5 | 0      | 0        | 0        |
| 388 | 0.06  | 0.24  | -1.21 | 4.56  | 4.74  | 3.29  | 4.5  | 0.2754 | 18.197   | 51286.14 |
| 389 | 0.96  | 0.83  | 2.06  | 10.96 | 10.83 | 12.06 | 10   | 0      | 0        | 0.0001   |
| 391 | -0.38 | -0.2  | -0.1  | 10.12 | 10.3  | 10.4  | 10.5 | 0      | 0.0001   | 0.004    |
| 393 | -0.08 | 0.18  | 0.03  | 3.12  | 3.38  | 3.23  | 3.2  | 7.5858 | 416.8693 | 58884.36 |
